# Supplementary material for: Dual-specificity phosphatases 22-deficient T cells contribute to the pathogenesis of ankylosing spondylitis
Source: PubMed Central journal article supplement (PMC9921195; doi:10.1186/s12916-023-02745-6), 2023-02-10
Supplement: 12916_2023_2745_MOESM1_ESM.pdf [file 12916_2023_2745_MOESM1_ESM.pdf]

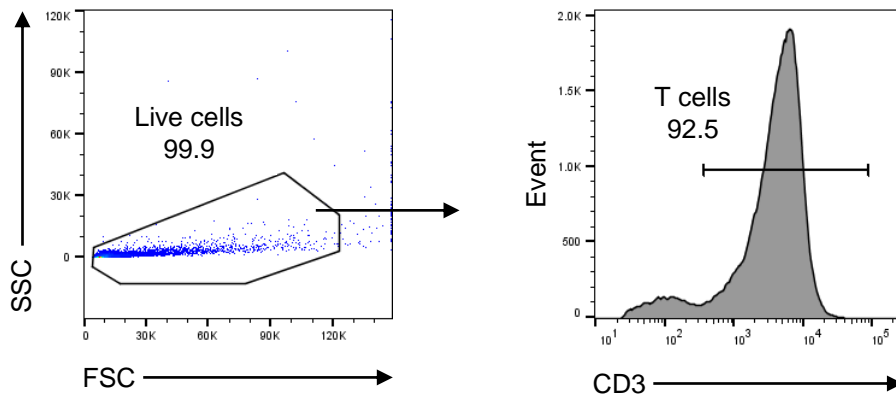

**Fig. S1. Purity of the isolated human T cells is more than 90%.** Flow cytometry analyses of CD3-positive T cells in the negatively isolated T cells from peripheral blood leukocytes of a representative AS patient.

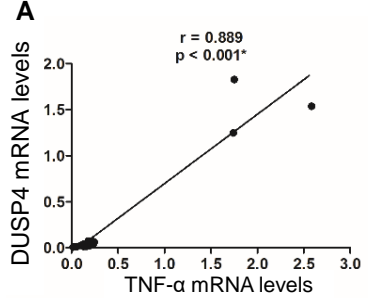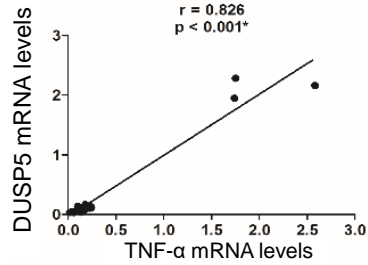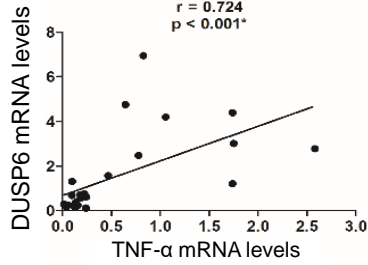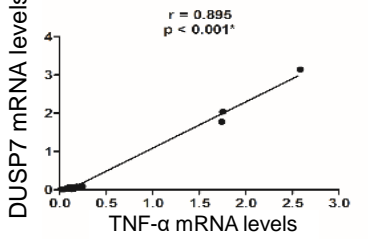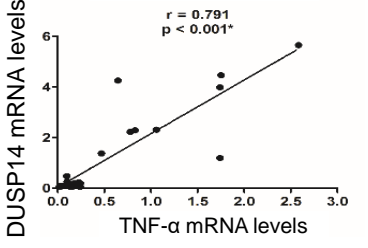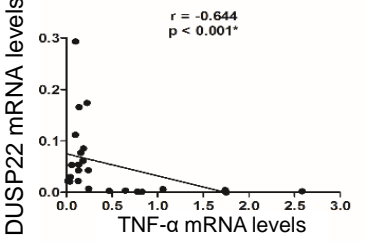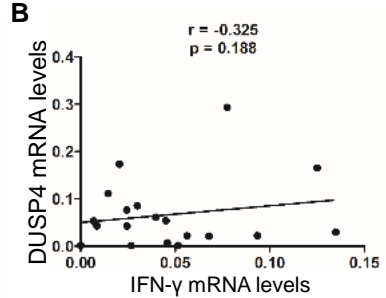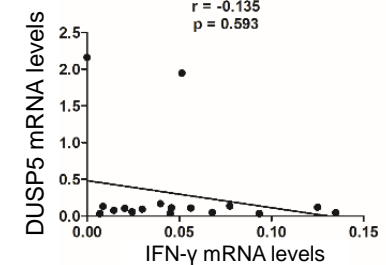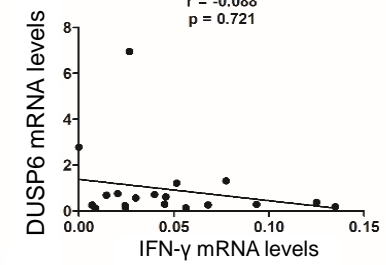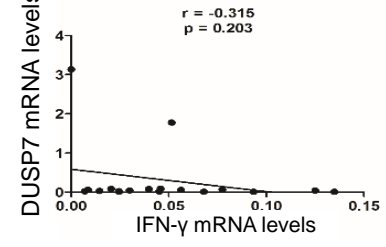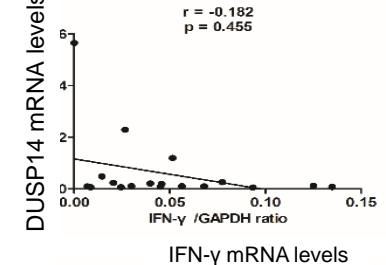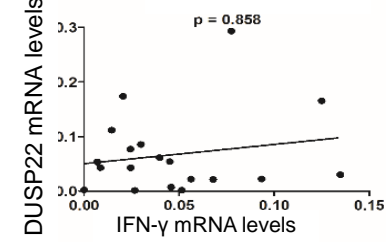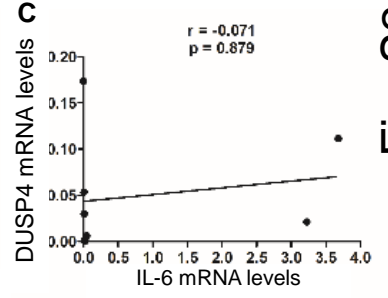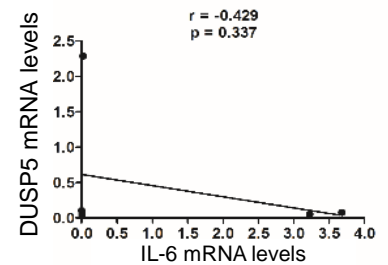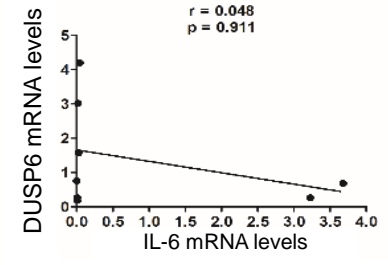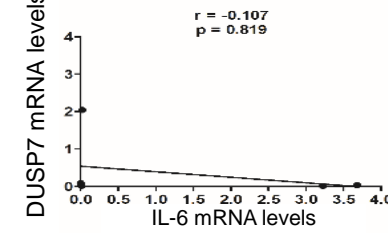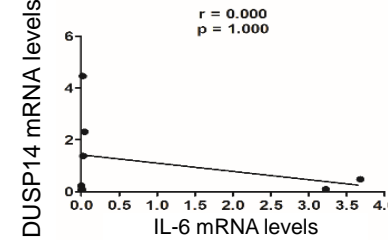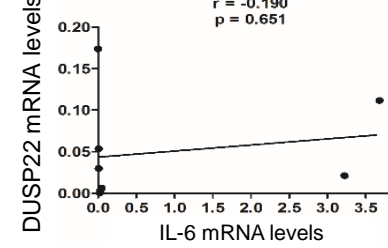

**Fig. S2. Correlations between the mRNA levels of DUSPs and proinflammatory cytokines in peripheral T cells in patients with ankylosing spondylitis.** Association between DUSPs (DUSP4, DUSP5, DUSP6, DUSP7, DUSP14, DUSP22) and TNF- $\alpha$  (A), IFN- $\gamma$  (B), IL-6 (C) mRNA levels in peripheral blood T cells in patients with ankylosing spondylitis. \*  $p < 0.05$ .

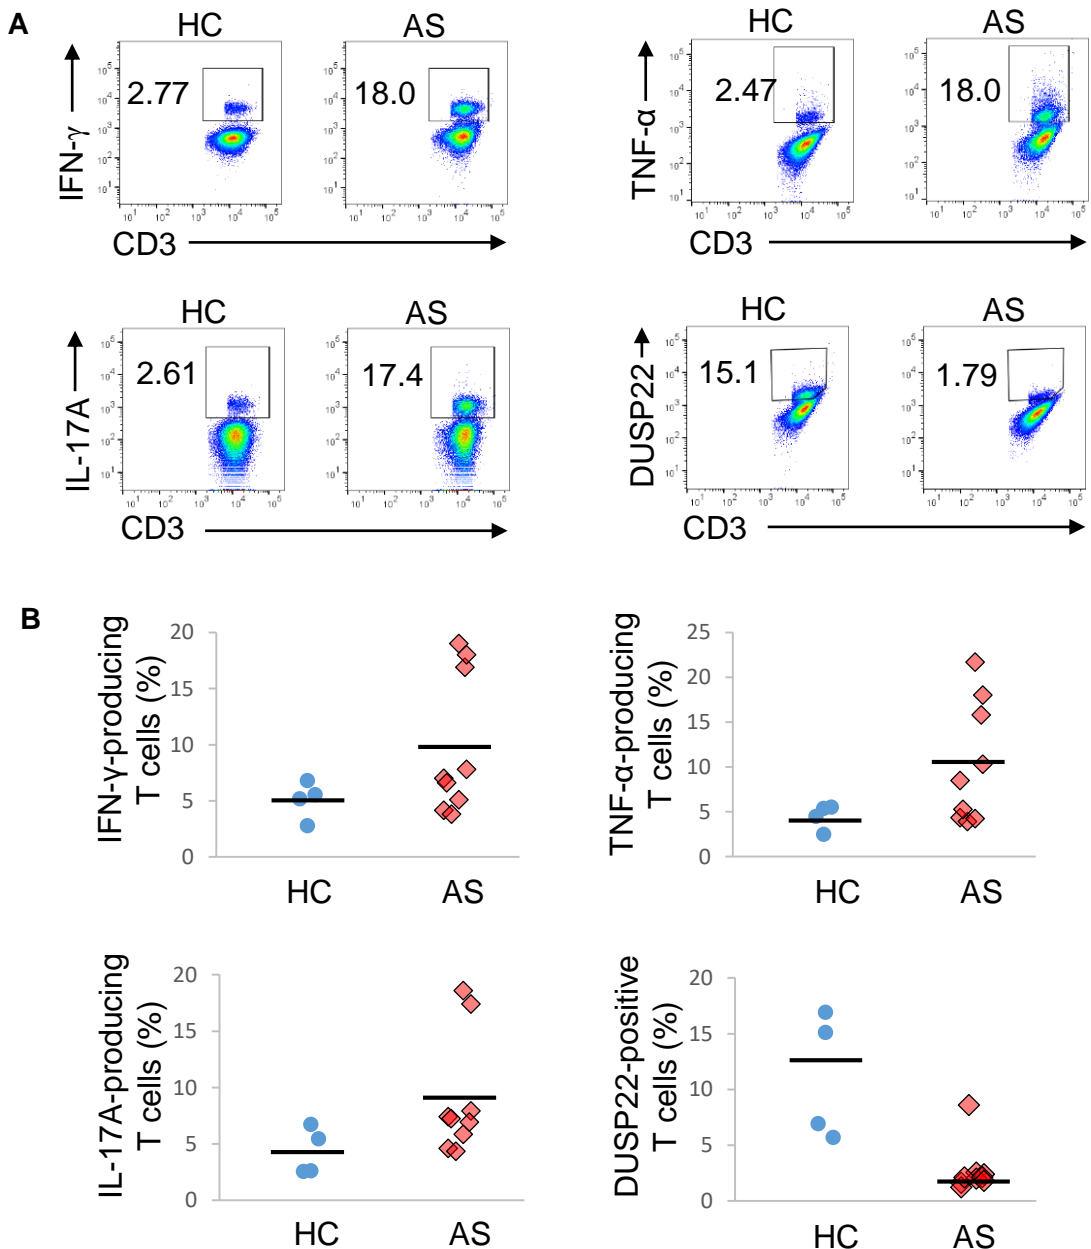

**Fig. S3. Increased proinflammatory cytokines and decreased DUSP22 protein levels are shown in T cells of AS patients.** (A) Flow cytometry analyses of IFN- $\gamma^+$ , TNF- $\alpha^+$ , IL-17A $^+$ , and DUSP22 $^+$  T cells [CD3-gated] from peripheral blood leukocytes of 9 AS patients and 4 healthy controls. The frequencies of IFN- $\gamma$ -, TNF- $\alpha$ -, and IL-17A-producing T cells were increased in AS patients compared to healthy controls, while the frequencies of DUSP22-positive T cells were decreased in AS patients. The results from a representative healthy control (HC) and a representative AS patients are shown (A). (B) Statistical analyses of cytokine-producing T cells or DUSP22-positive T cells in the HC or AS group are shown. Bar, mean of the group values.

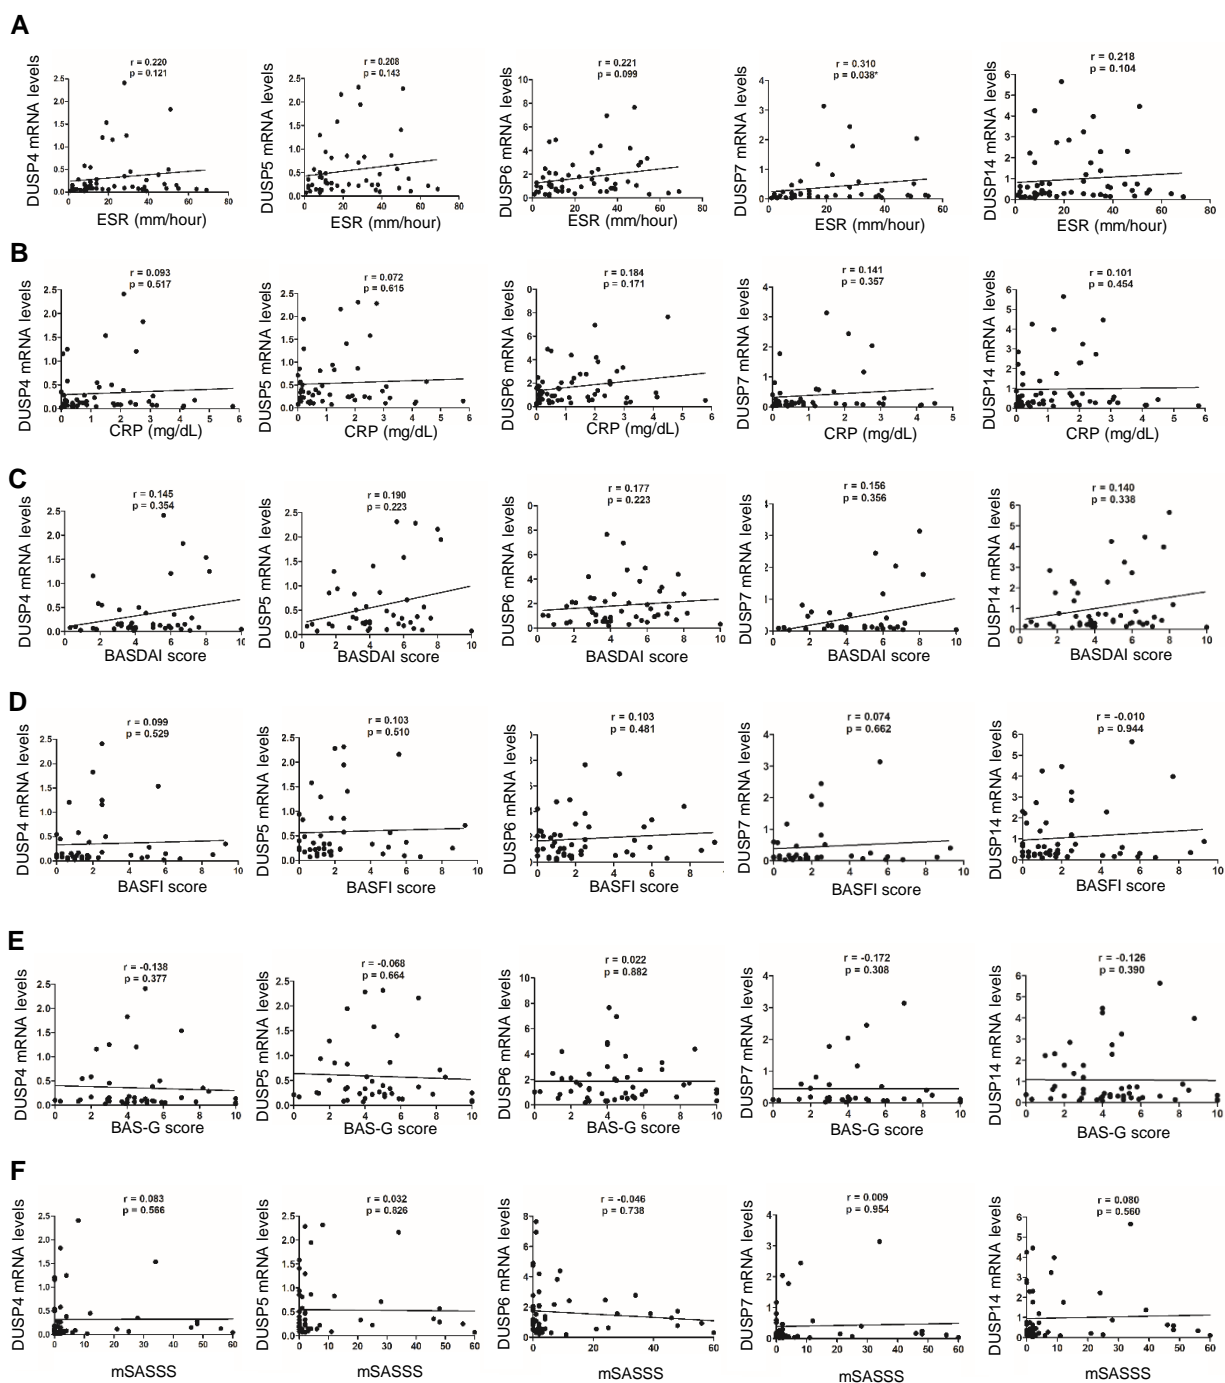

**Fig. S4. Correlations between the mRNA levels of DUSPs in peripheral T cells and disease activity in patients with ankylosing spondylitis.** Association between DUSPs mRNA levels in peripheral blood T cells and erythrocyte sedimentation rate (ESR) (A), C-reactive protein (CRP) levels (B), Bath Ankylosing Spondylitis Disease Activity Index (BASDAI) (C), BAS Functional Index (BASFI) (D), BAS Patient Global Score (BAS-G) (E), and the modified Stoke Ankylosing Spondylitis Spinal Score (mSASSS) (F) in patients with ankylosing spondylitis. \*  $p < 0.05$ .

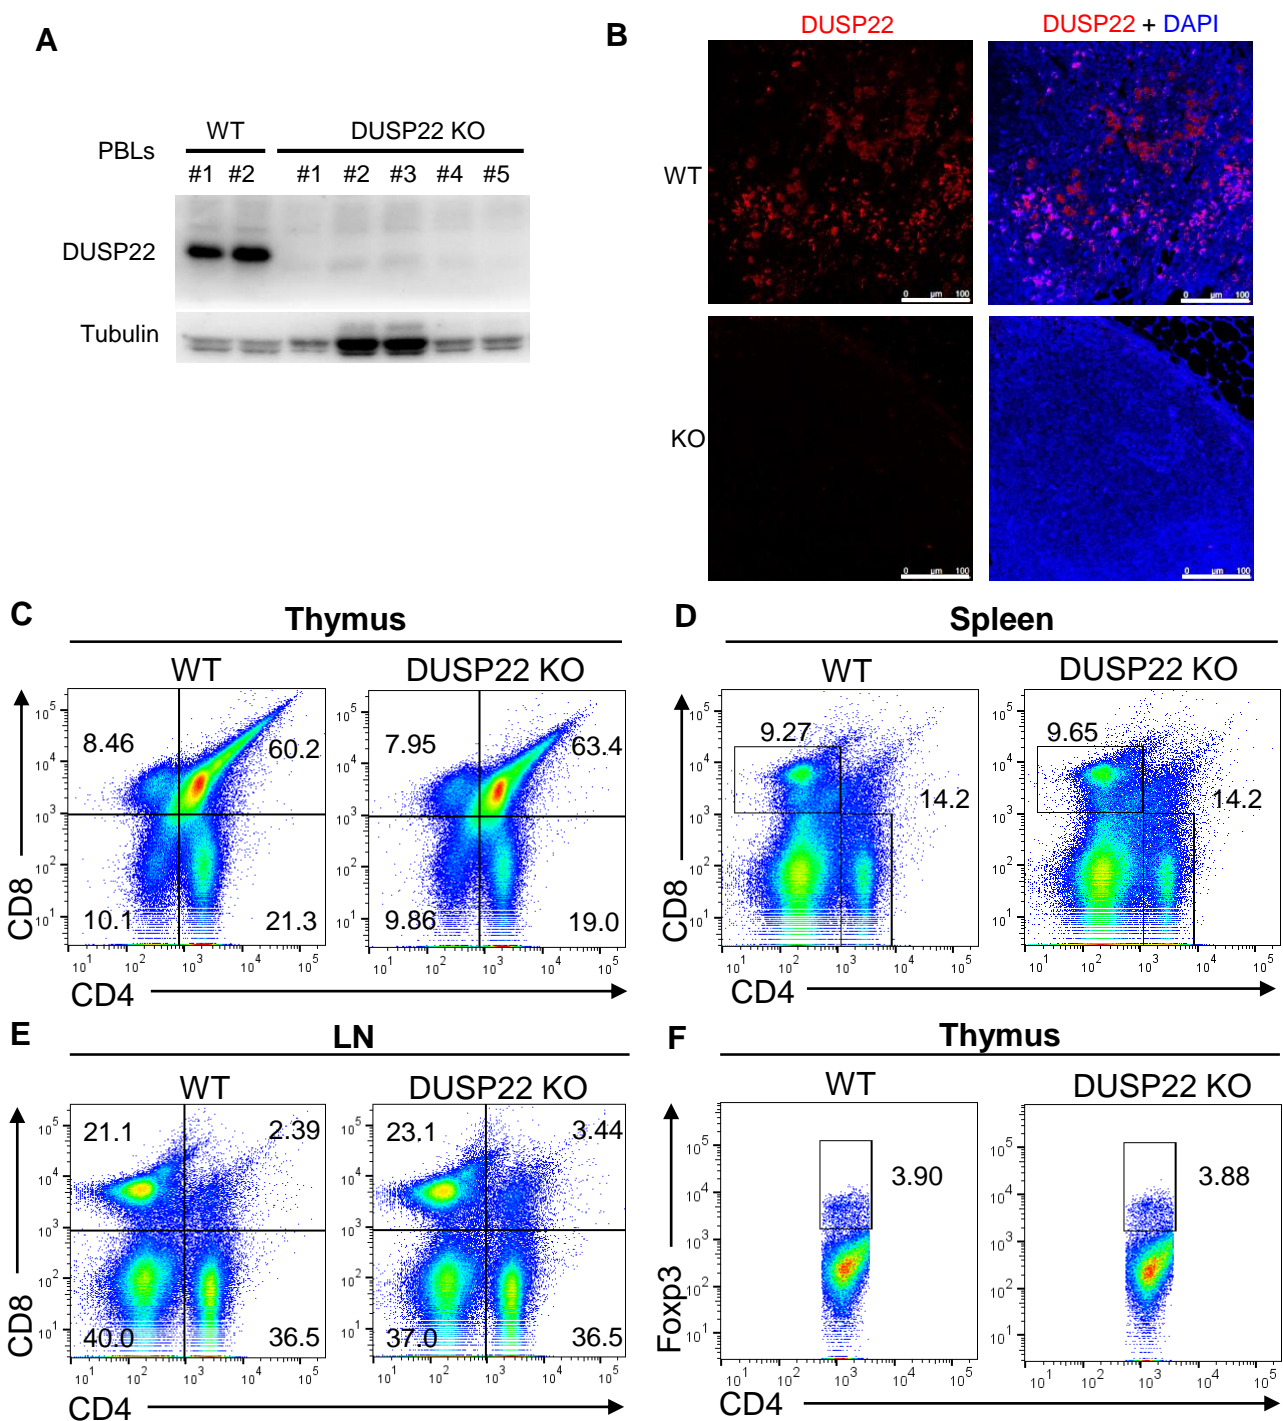

**Fig. S5. DUSP22 knockout mice display normal T-cell development.** (A) Immunoblotting analyses of DUSP22 expression in peripheral blood leukocytes (PBLs) of wild-type (WT) or DUSP22 KO mice. (B) Immunofluorescence analyses of DUSP22 expression in the lymph node of WT or DUSP22 KO mice. Scale bar, 100  $\mu$ m. (C-F) Flow cytometry analyses of T cells (C-E) and Treg cells (F) from the thymus, spleen, or lymph nodes of 5-week-old DUSP22 KO or WT mice. Data shown are representative of three independent experiments.

**A**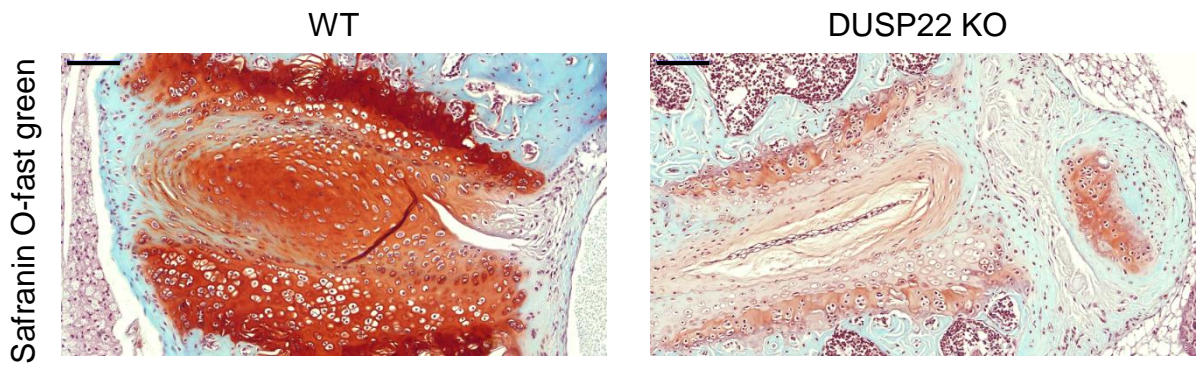**B**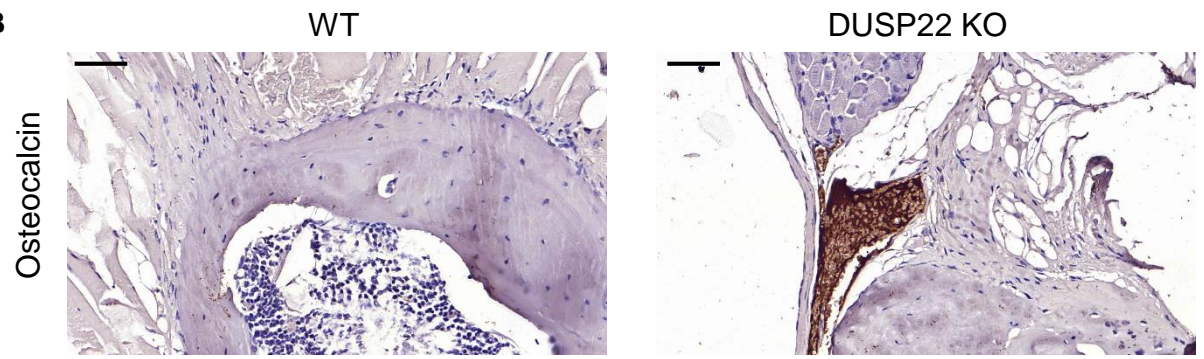

**Fig. S6. DUSP22 KO mice display cartilage destruction and osteocalcin induction in the spinal joint.** (A and B) The paraffin-embedded spine section of DUSP22 knockout (KO) or wild-type (WT) mice were subjected to safranin O-fast green staining (A) and osteocalcin staining (B). Scale bar, 100  $\mu$ m.

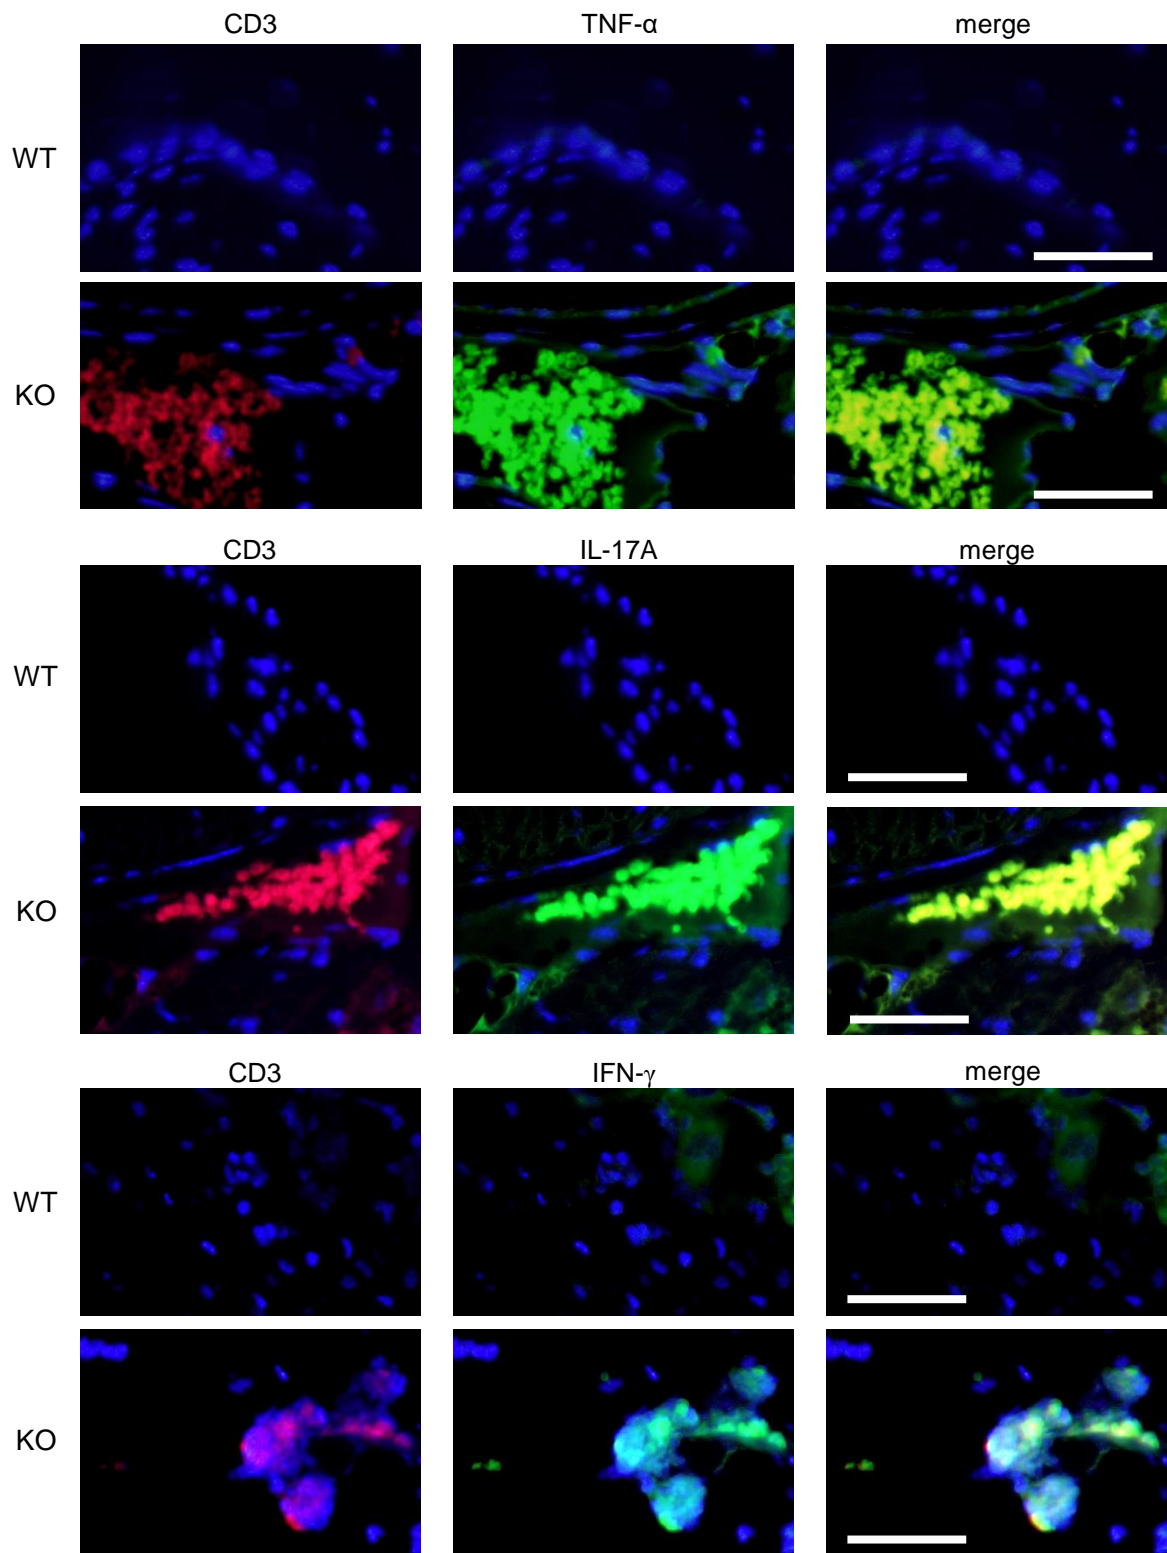

**Fig. S7. Aged DUSP22 KO mice display the increase of inflammatory T cells in the vertebrae.** High magnification images of Fig. 5 showed the increase of TNF- $\alpha$ <sup>+</sup>, IL-17A<sup>+</sup>, and IFN- $\gamma$ <sup>+</sup> CD3<sup>+</sup> T cells in the vertebrae of aged DUSP22 KO mice. Scale bar, 50  $\mu$ m.
