# Supplementary material for: Dual-specificity phosphatases 22-deficient T cells contribute to the pathogenesis of ankylosing spondylitis
Source: PubMed Central journal article supplement (PMC9921195; doi:10.1186/s12916-023-02745-6), 2023-02-10
Supplement: 12916_2023_2745_MOESM2_ESM.pdf [file 12916_2023_2745_MOESM2_ESM.pdf]

**Table S1. Probes and primers of Q-PCR for human DUSP mRNA levels**

| <b>Gene</b> | <b>Accession Number</b> | <b>Probe Sequence</b>       | <b>Sense Primer Sequence</b> | <b>Anti-sense Primer Sequence</b> |
|-------------|-------------------------|-----------------------------|------------------------------|-----------------------------------|
| DUSP1       | NM_004417               | AACTCAGCACATTTCGGGACCAAT    | GCAGTTATGGTGATGACTTA         | CGGGAATAATACTGGTAGG               |
| DUSP2       | NM_004418               | TGAAAGGCTCACAGACAGACACAC    | GATGGGTGTGTCATGTTG           | CTGAGCACAAATAATTTTCCA             |
| DUSP3       | NM_004090               | CCCAGTTGTCCTGTTTCTGTA ACTT  | GCACATAAAGAAGCTTGC           | GCATCTTAGGCCTTACAC                |
| DUSP4       | NM_001394               | TGTATTCGGAGTCCTTATTGCCATTCT | CTCCTTCCCCATCATTTC           | GCTCTAAGTTGGAGTGTTT               |
| DUSP5       | NM_004419               | AGAGCCCTCATCAGCCAGTG        | GGATGTAAAACCCATTTTAC         | AGCTGACATTTACCACTG                |
| DUSP6       | NM_001946               | TTCCGCACTTGGTAACCTTGTCTA    | TCTGCAATCTACGTGAAA           | GGAGCAAATCTCTCTGTTA               |
| DUSP7       | NM_001947               | TCGCCTGTGATGACTGCTGC        | CAGTCTGACTTAGCTCTG           | GGCAGAAAATGCAAAGAC                |
| DUSP8       | NM_004420               | AGTCCTGTTCCCGTTCCTCT        | CTGTCATCCCTCCTTTCA           | AACGCAACAGACATATGG                |
| DUSP9       | NM_001395               | CCCAGTGATCCCGTCAAGACAT      | GTCACCTCCCTGTTTCTC           | CACCCTCACTACAAAGA                 |
| DUSP10      | NM_007207               | AGCCACTGACAGCAACAAGCA       | GGCCTGTTCAACTACAAG           | GCTTCCTCAATGAACTCA                |
| DUSP11      | NM_003584               | CAACCAGTCCACAATAAGCCTGTAA   | CCAGGTCAAGTGATTTTG           | GATGGTGTCTCTGGTAAA                |
| DUSP12      | NM_007240               | TGTGCTGCCTTTGCTTCTTATCATTC  | GGAAGAACTTGCAGATG            | CCATGTAAAGCATAGTTTCC              |
| DUSP13      | NM_001007271            | CCTAGAGCCTGCTACTCCATCTG     | CACAGAAGATGGTGGAAG           | CACACTTGATGCTGTTTC                |
| DUSP14      | NM_007026               | TTAGTGCCACTGAAGCCTGC        | ACACCTGATGCCTTACTG           | CCTCCCTCCCTATCTCTTA               |
| DUSP15      | NM_080611               | ATCCACTGCTGCCGCCTTAAT       | GCACTTCAAAGAATGTATCA         | CGTCACAGTCATCACATA                |
| DUSP16      | NM_030640               | TTCCCGTGACCTGTTCTCTGAC      | GAGAGCCCCTTTGAAAAG           | CCGAAAAGCTAGACTGAC                |
| DUSP18      | NM_152511               | ACCCTGGCTCAACCTGTTACCCG     | CGTTGCCGTAGAGATGG            | GGTCTTCAGAGAAATCCTGG              |
| DUSP19      | NM_080876               | CTCTTGATATGTACGAAGCTGCTCCAT | TCCTGATGAATTCTGAACAA         | CCTGTATTCTGTCCACTTA               |
| DUSP21      | NM_022076               | CCCTTTAACAAGGCACCATCCG      | GCACCAAGACTGAACTTG           | CGTTCAAAACTCCAACCC                |
| DUSP22      | NM_020185               | AATATGTGTCACCTTGTTCTTGCTCA  | CCCTGTAACATGCCATAG           | GCACTATCATGGACAGAC                |
| DUSP23      | NM_017823               | AGCAGTCTTCCAGTTCTACCAGC     | GAGACCTATGAGCAGGAG           | CAGTGTCTTCAGCCAATG                |
| DUSP24      | NM_016086               | CATCACCTTGGCTCTGTCATTCTG    | GTGTCACTTCATTGAAATTCA        | TGAGGTAGGCTATGATGG                |
| DUSP26      | NM_024025               | TCTCTTCGCTGTCTGTCTCTATGCT   | CTCTCTCCCTCACCAAAA           | GGGTTCTCTGTCTGGTTC                |
| DUSP27      | NM_001080426            | AGACCTCATCCACCTCATTCCAG     | TCAGGGAGAAGATGGATG           | CACACTTCTCAGCTATG                 |
| GAPDH       | NM_002046               | CCTTCATTGACCTCAACTACATGGTT  | CTGGTAAAGTGGATATTGTTG        | CCCCTTATTGTTTGGAG                 |

**Table S2. Demographic characteristics of the second batch of AS patients and healthy controls**

|                          | AS<br>N = 9       | Healthy controls<br>N = 4 | <i>p</i> value |
|--------------------------|-------------------|---------------------------|----------------|
| Age, years               | 49.8 ± 12.4       | 41.5 ± 2.1                | 0.148          |
| Gender, male             | 4 (44.4)          | 2 (50.0)                  | 1.000          |
| Disease duration, years  | 17.0 (10.5, 25.5) | -                         | -              |
| HLA-B27 positivity       | 9 (100.0)         | -                         | -              |
| mSASSS (0-72)            | 2 (0, 19)         | -                         | -              |
| Sacroiliitis grade (0-4) | 2 (2, 3.5)        | -                         | -              |
| ESR, mm/hour             | 13.6 ± 9.0        | -                         | -              |
| CRP, mg/dl               | 0.1 (0.1, 0.4)    | -                         | -              |
| BASDAI (0-10)            | 2.0 ± 0.8         | -                         | -              |
| BASFI score (0-10)       | 2.9 ± 1.9         | -                         | -              |
| BAS-G score (0-10)       | 2.4 ± 1.9         | -                         | -              |
| Biologic used            | 0 (0.0%)          | -                         | -              |

Abbreviation: BASDAI, Bath Ankylosing Spondylitis Disease Activity Index; BASFI, BAS Functional Index; BAS-G, BAS Patient Global Score; CRP, C-reactive protein; ESR, erythrocyte sedimentation rate; HLA, human leukocyte antigen; mSASSS, modified Stokes Ankylosing Spondylitis Spinal Score. Data are presented as frequency (percentage), mean ± standard deviation, or median (interquartile range).
