# Supplementary material for: Dual-specificity phosphatases 22-deficient T cells contribute to the pathogenesis of ankylosing spondylitis
Source: PubMed Central journal article supplement (PMC9921195; doi:10.1186/s12916-023-02745-6), 2023-02-10

**Fig. S5A**

**DUSP22**

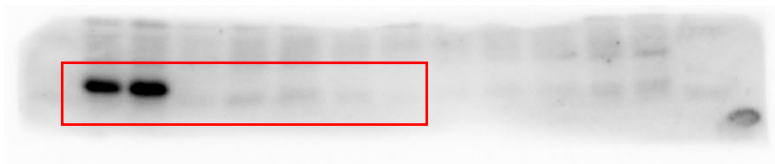

**Tubulin**

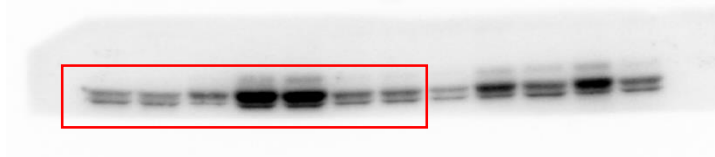

Supplement: 12916_2023_2745_MOESM3_ESM.pdf [file 12916_2023_2745_MOESM3_ESM.pdf]
